# Supplementary material for: Mentoring und arbeitsplatzbasierte Prüfungen im Praktischen Jahr
Source: Springer Nature journal article supplement (doi:10.1007/s00101-020-00902-7), 2020-12-14

# Praktisches Jahr in der KAI

2018 bis 2020  
Erfasste Fragebögen = 32

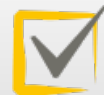

## Auswertungsteil der geschlossenen Fragen

### Legende

Frage-  
text

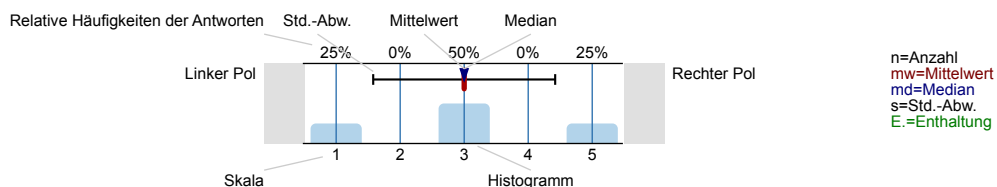

## 1. Allgemeine Angaben

1.1) Bitte geben Sie Ihr Geschlecht an.

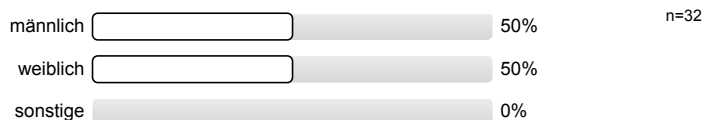

1.2) In welchem PJ-Tertial waren Sie an unserer Klinik?

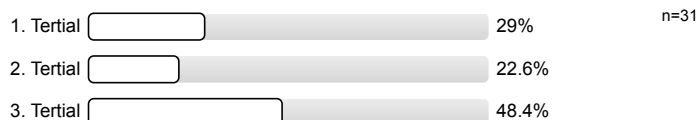

1.3) Haben Sie an Diensten außerhalb der Kernarbeitszeiten (FL, S, SN, N, feiertags) teilgenommen?

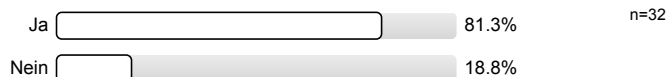

1.4) Haben Sie am Notarztdienst (NEF Mitte) teilgenommen?

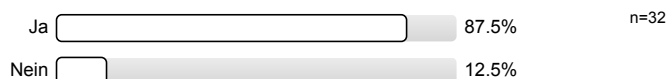

1.5) Sind Sie auf die Palliativstation rotiert?

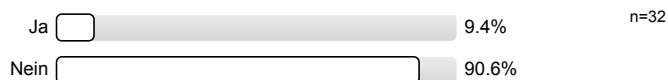

1.6) Haben Sie am Schmerzdienst teilgenommen?

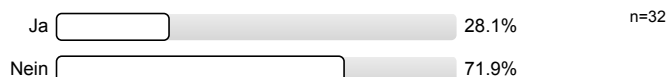

## 2. Motivation und Kompetenzerleben

2.1) ...erlebte ich mich als neugierig und wissbegierig.

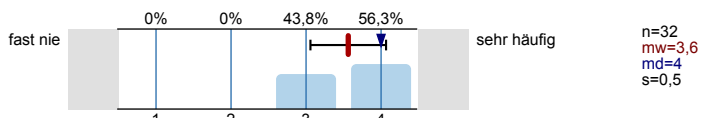

2.2) ...machte mir das Arbeiten Spaß.

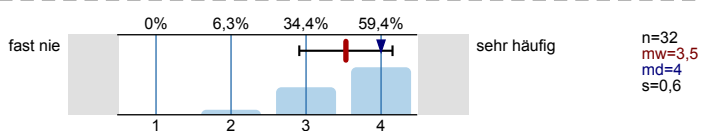

2.3) ...war ich von der Sache so fasziniert, dass ich alles um mich herum vergaß.

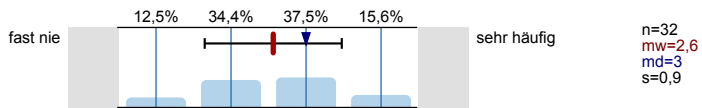

2.4) ...fand ich das Lernen richtig spannend.

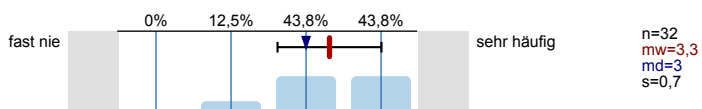

2.5) ...hatte ich das Gefühl, mich kaum von der Sache lösen zu können.

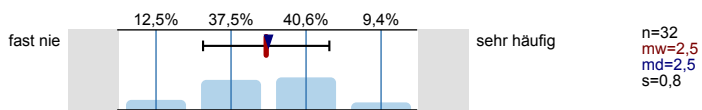

2.6) ...hatte ich den Eindruck nur aufgrund des mündlichen Examens (M3) zu lernen.

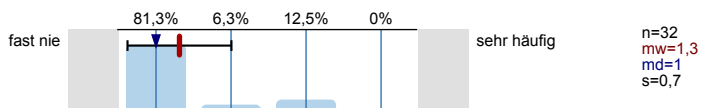

2.7) ...empfand ich das Lernen als anstrengend.

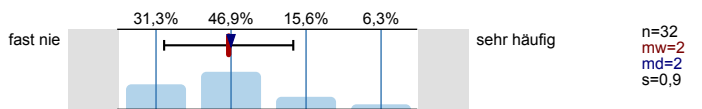

2.8) ...hatte ich das Gefühl mich zum Arbeiten zwingen zu müssen.

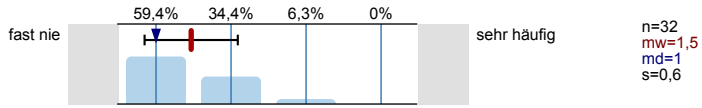

2.9) ...merkte ich selbst, was ich kann bzw. was ich noch nicht kann.

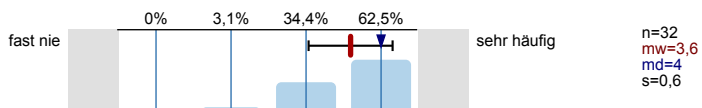

2.10) ...fühlte ich mich aktiv.

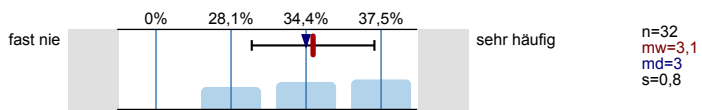

2.11) ...ergaben sich aus dem klinischen Alltag Probleme, mit denen ich mich eingehender beschäftigen möchte.

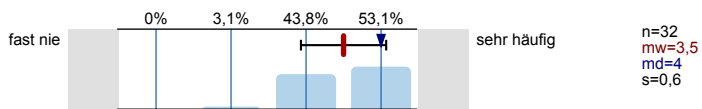

2.12) ...hatte ich den Eindruck, meinen Lernerfolg selbst steuern zu können.

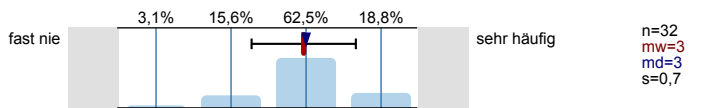

2.13) ...fühlte ich mich ernst genommen.

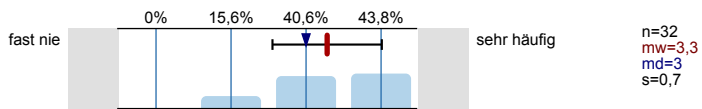

2.14) ...fühlte ich mich stark kontrolliert.

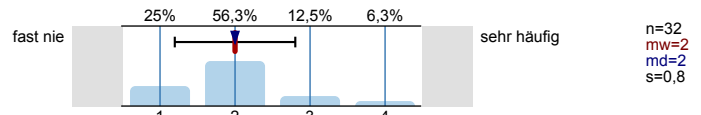

2.15) ...hatte ich das Gefühl, etwas zu tun, was ich auch selber tun wollte.

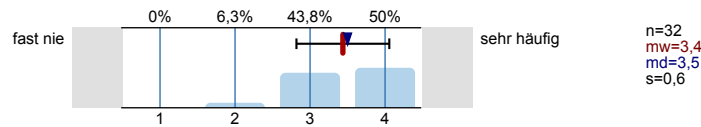

2.16) ...hatte ich das Gefühl, Entscheidungsspielräume zu haben.

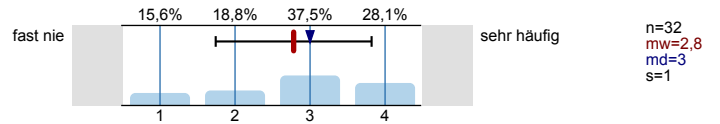

3. Ablauf und Struktur

3.1) Für meinen Einstieg ins Tertial benötige ich mehr Unterstützung.

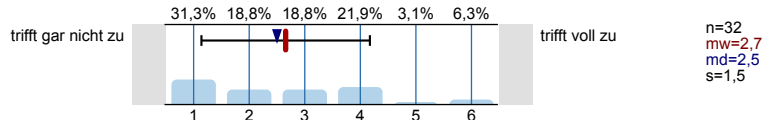

3.2) Die Teilnahme an Diensten empfand ich als sinnvoll.

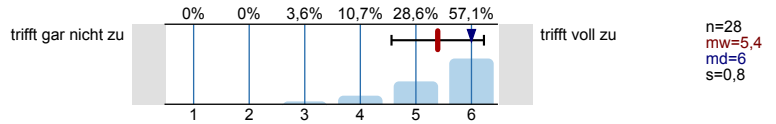

3.3) Im Operationssaal war das Tertial gut strukturiert.

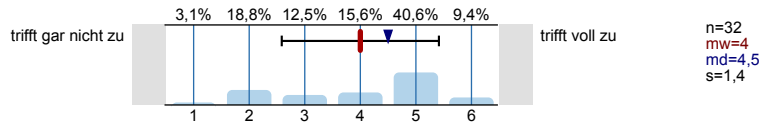

3.4) Im Operationssaal war das Tertial fachlich anspruchsvoll.

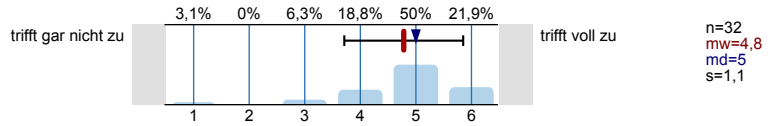

3.5) Auf der Intensivstation war das Tertial gut strukturiert.

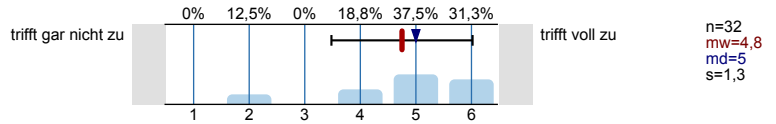

3.6) Auf der Intensivstation war das Tertial fachlich anspruchsvoll.

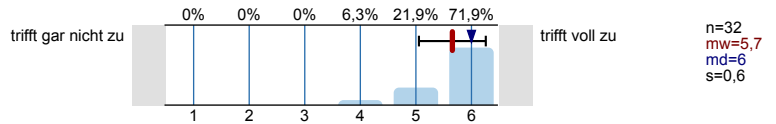

3.7) Das Tertial bot mir ausreichend Zeit für Selbststudium.

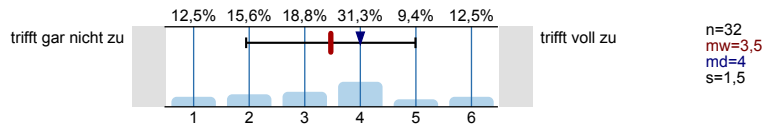

3.8) Meine Ansprechpartner in der Klinik waren klar definiert.

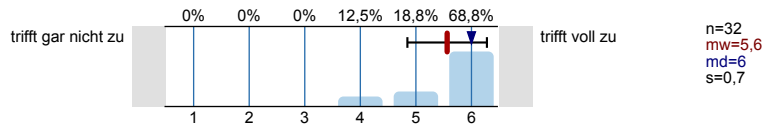

3.9) Die Organisation von Hospitationstagen (Palliativmedizin, Notfallmedizin, Schmerzmedizin) war einfach.

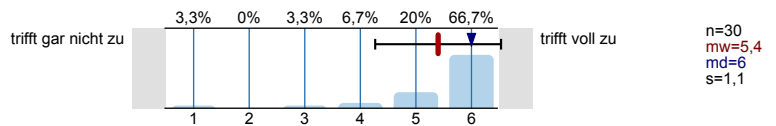

3.10) Der Wechsel zwischen Operationssaal und Intensivstation verlief reibungslos.

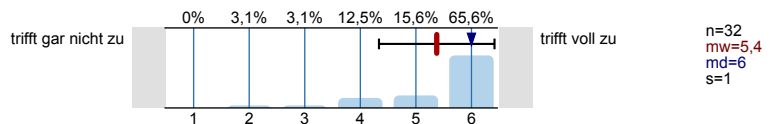

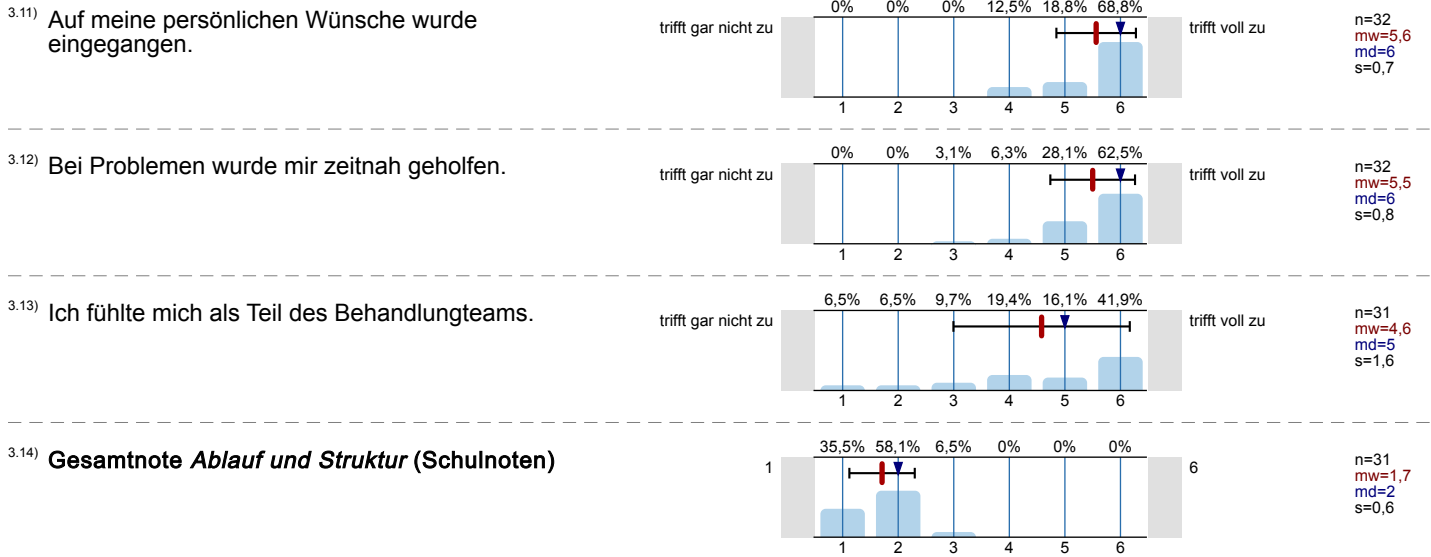

4. PJ-Seminar und Simulation

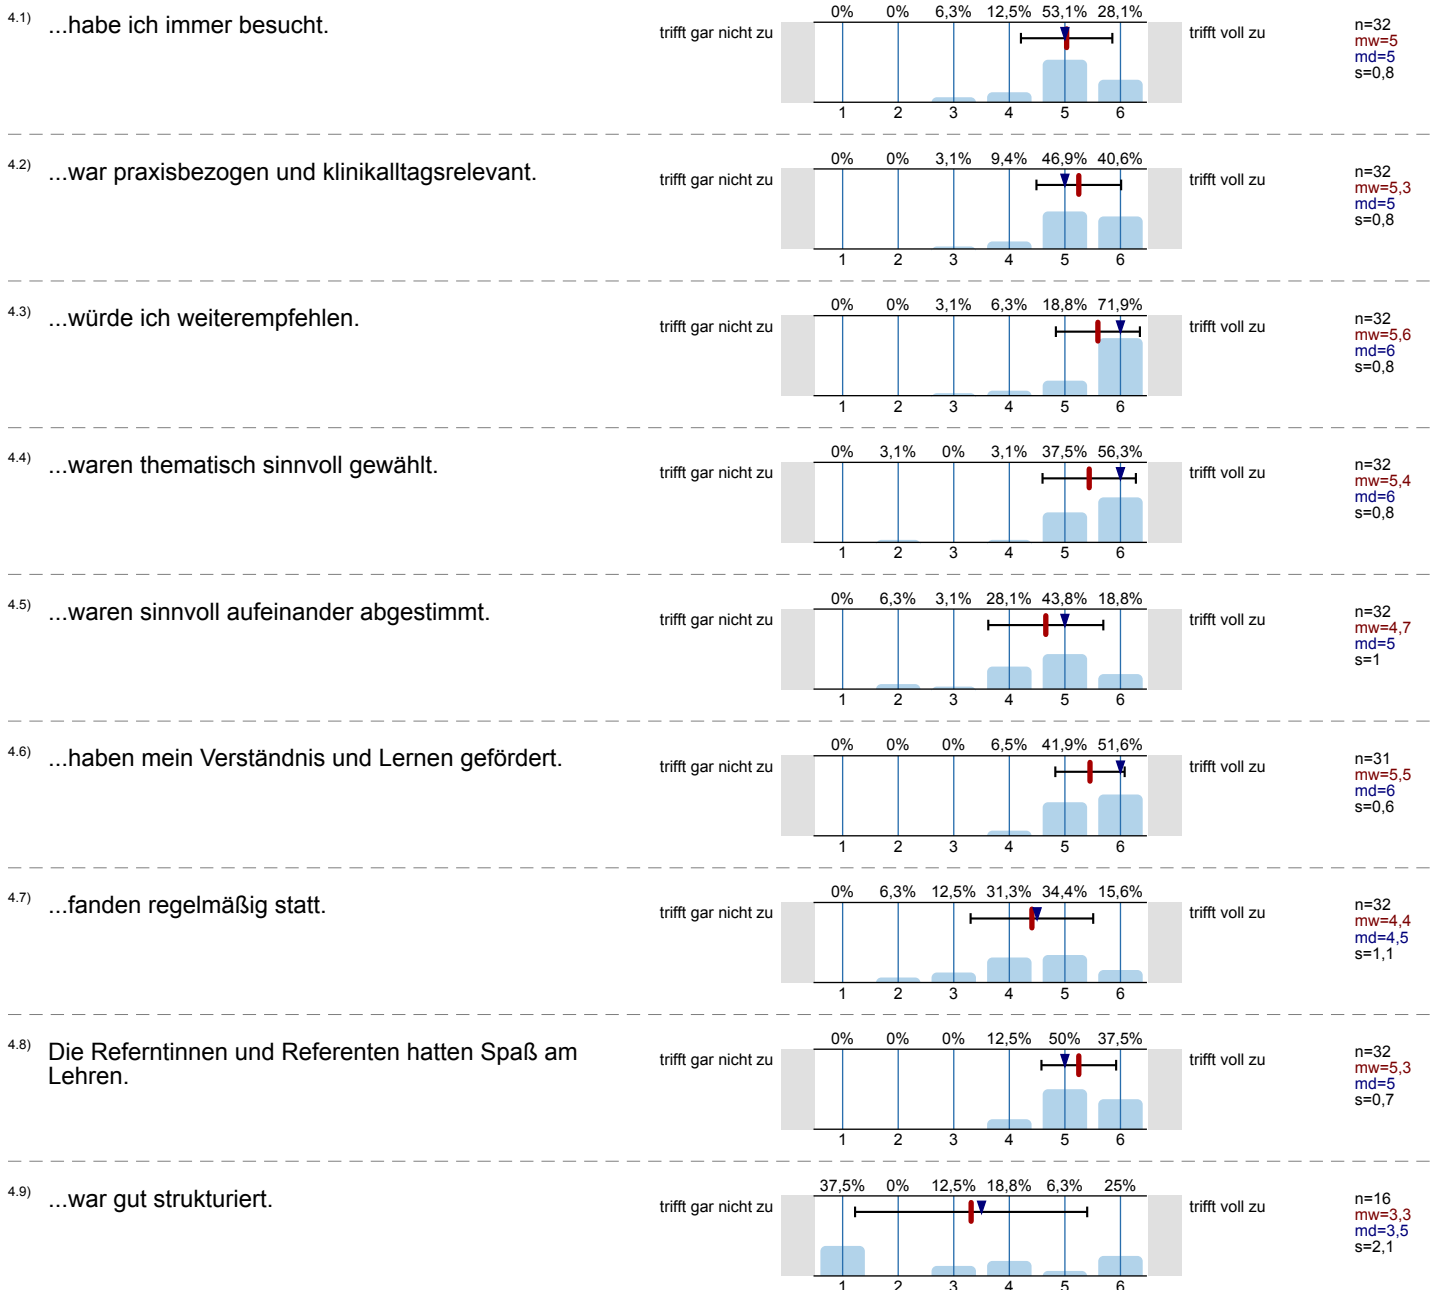

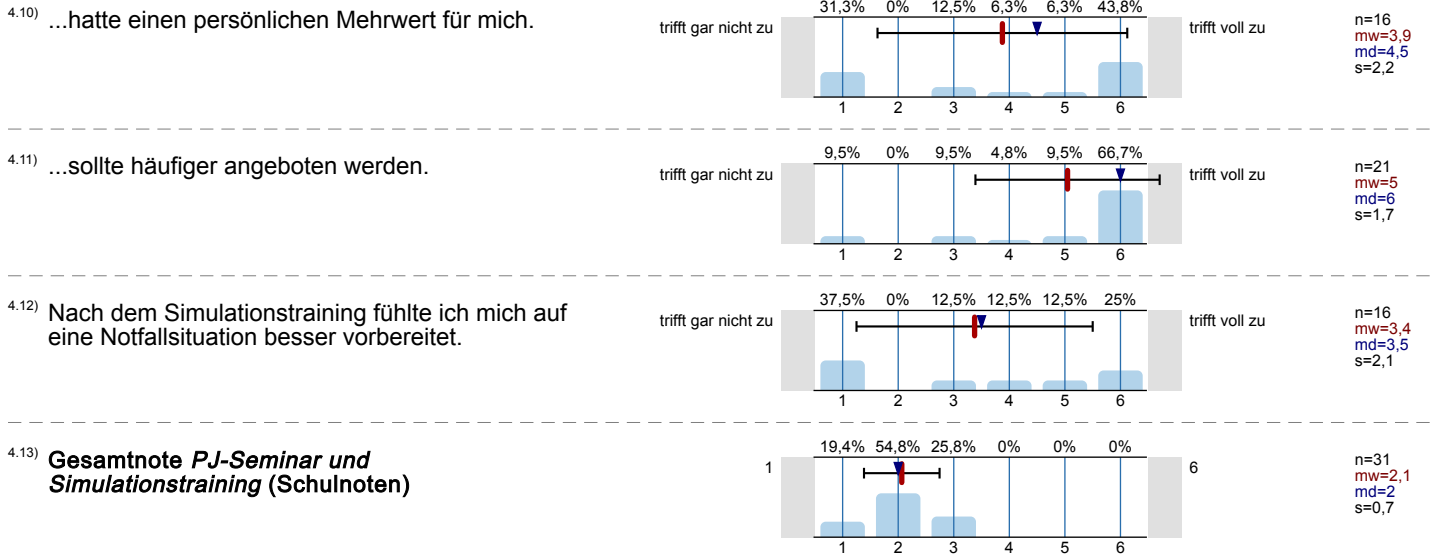

5. Mentoring

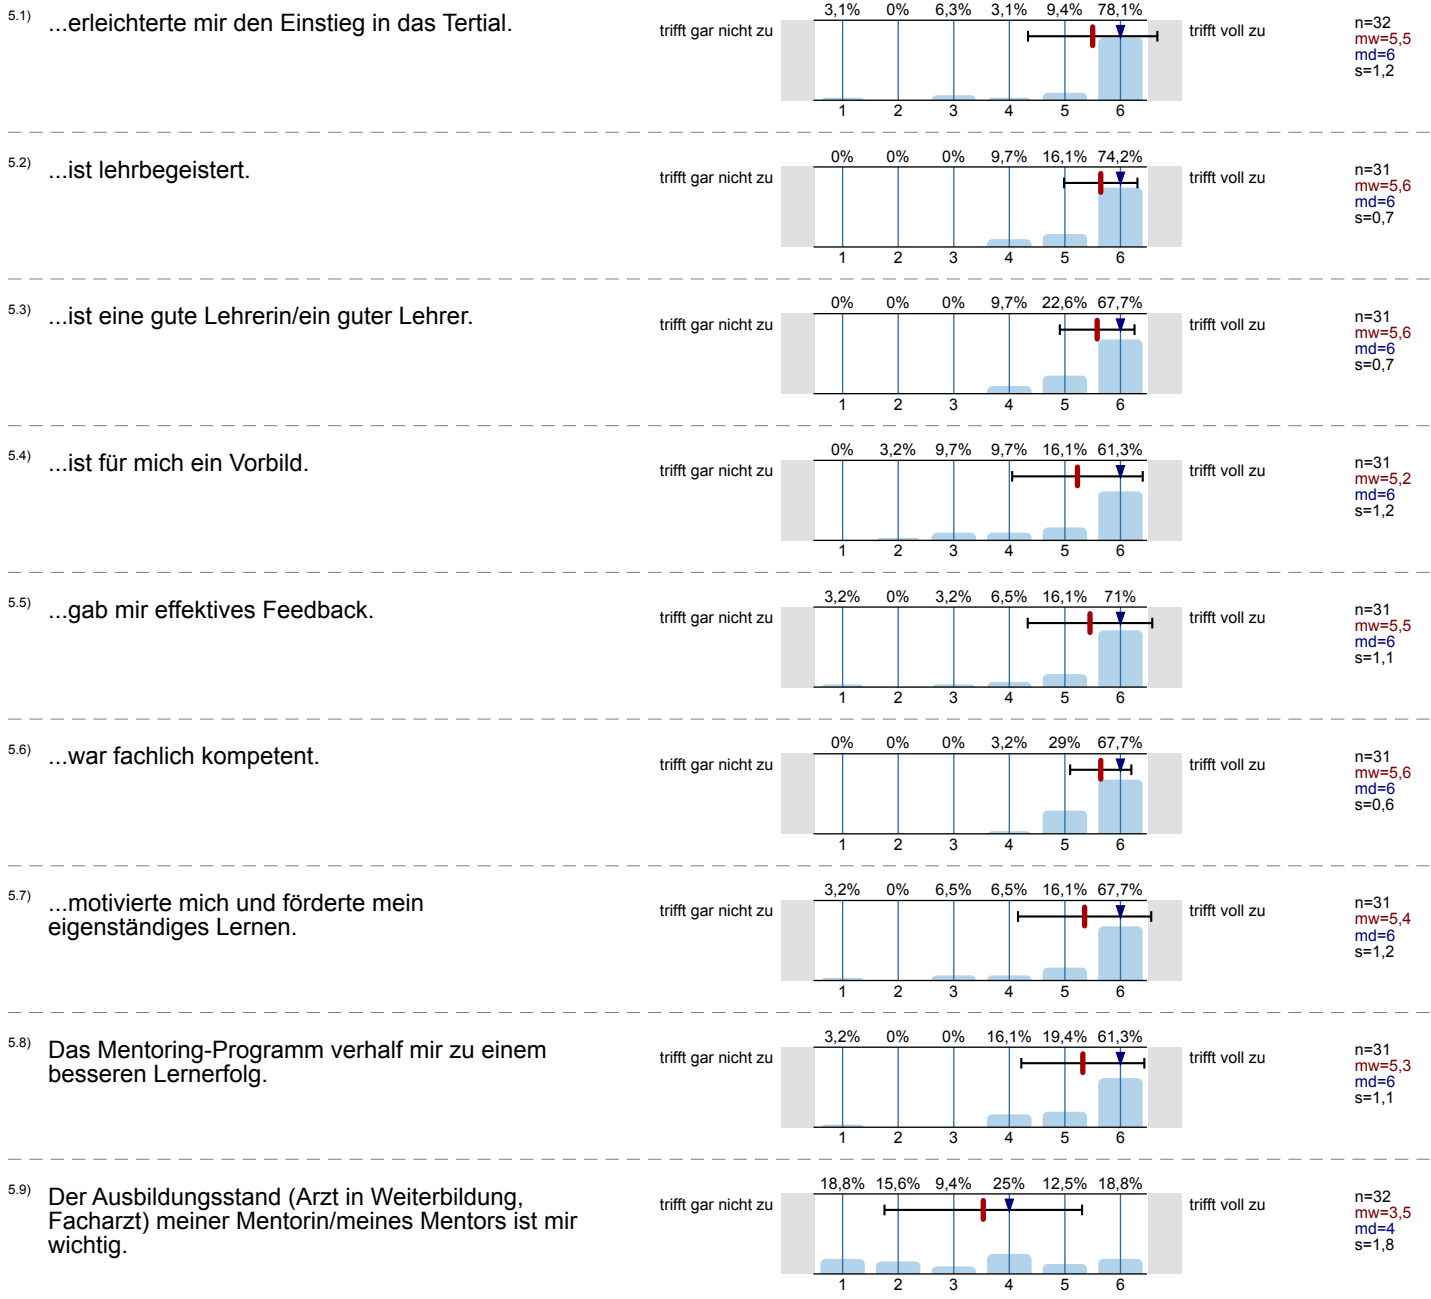

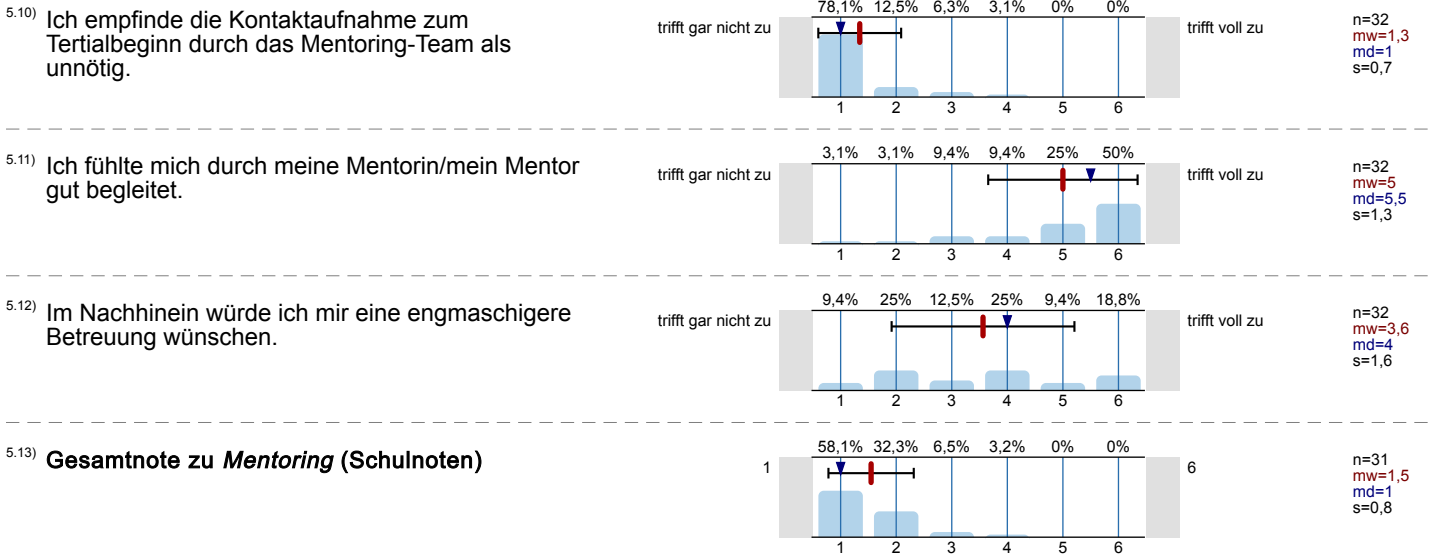

6. Formative Prüfung und Feedback

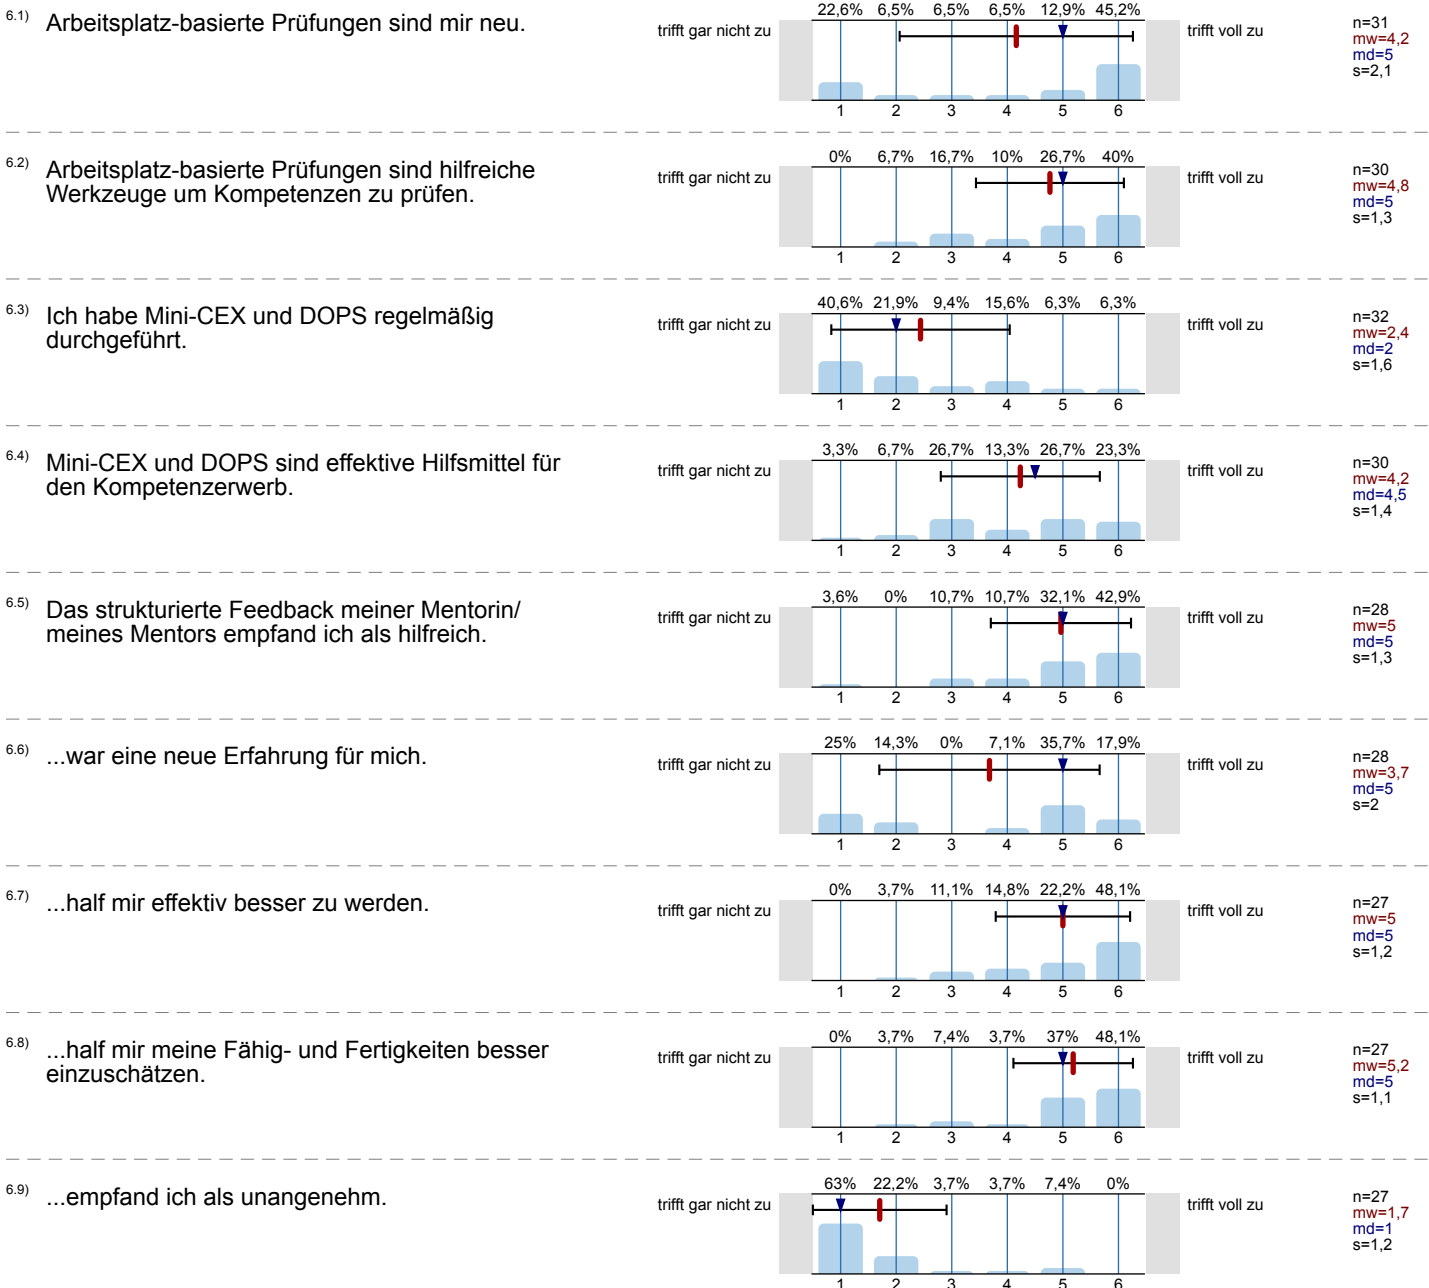

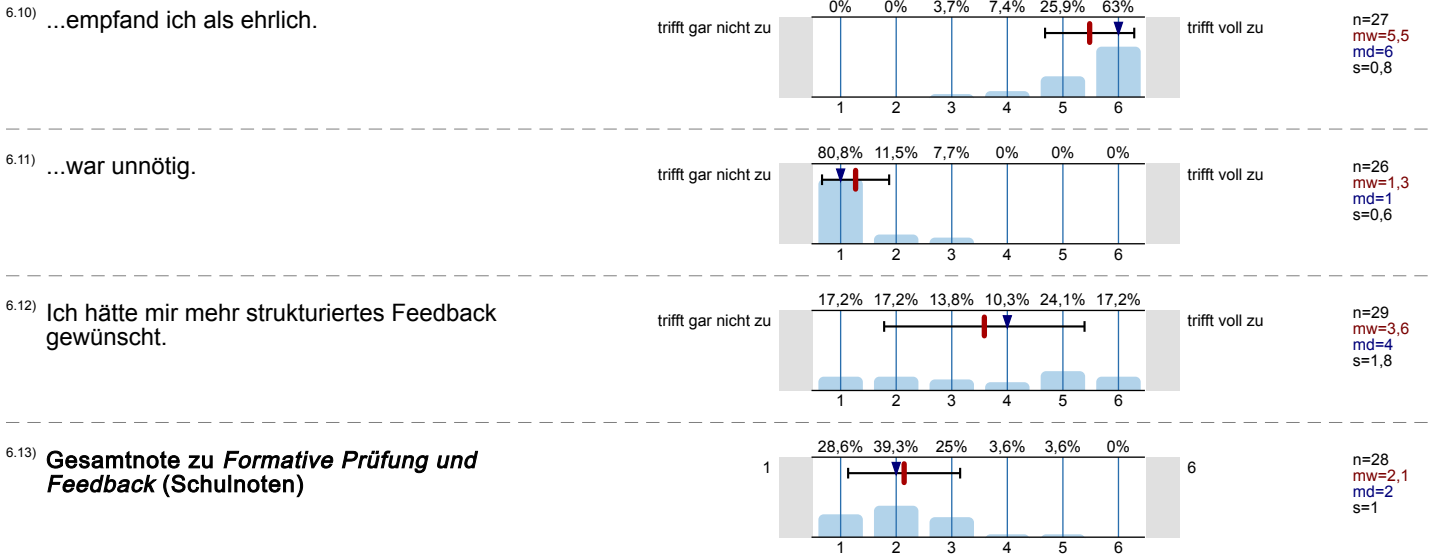

7. Gesamtevaluation

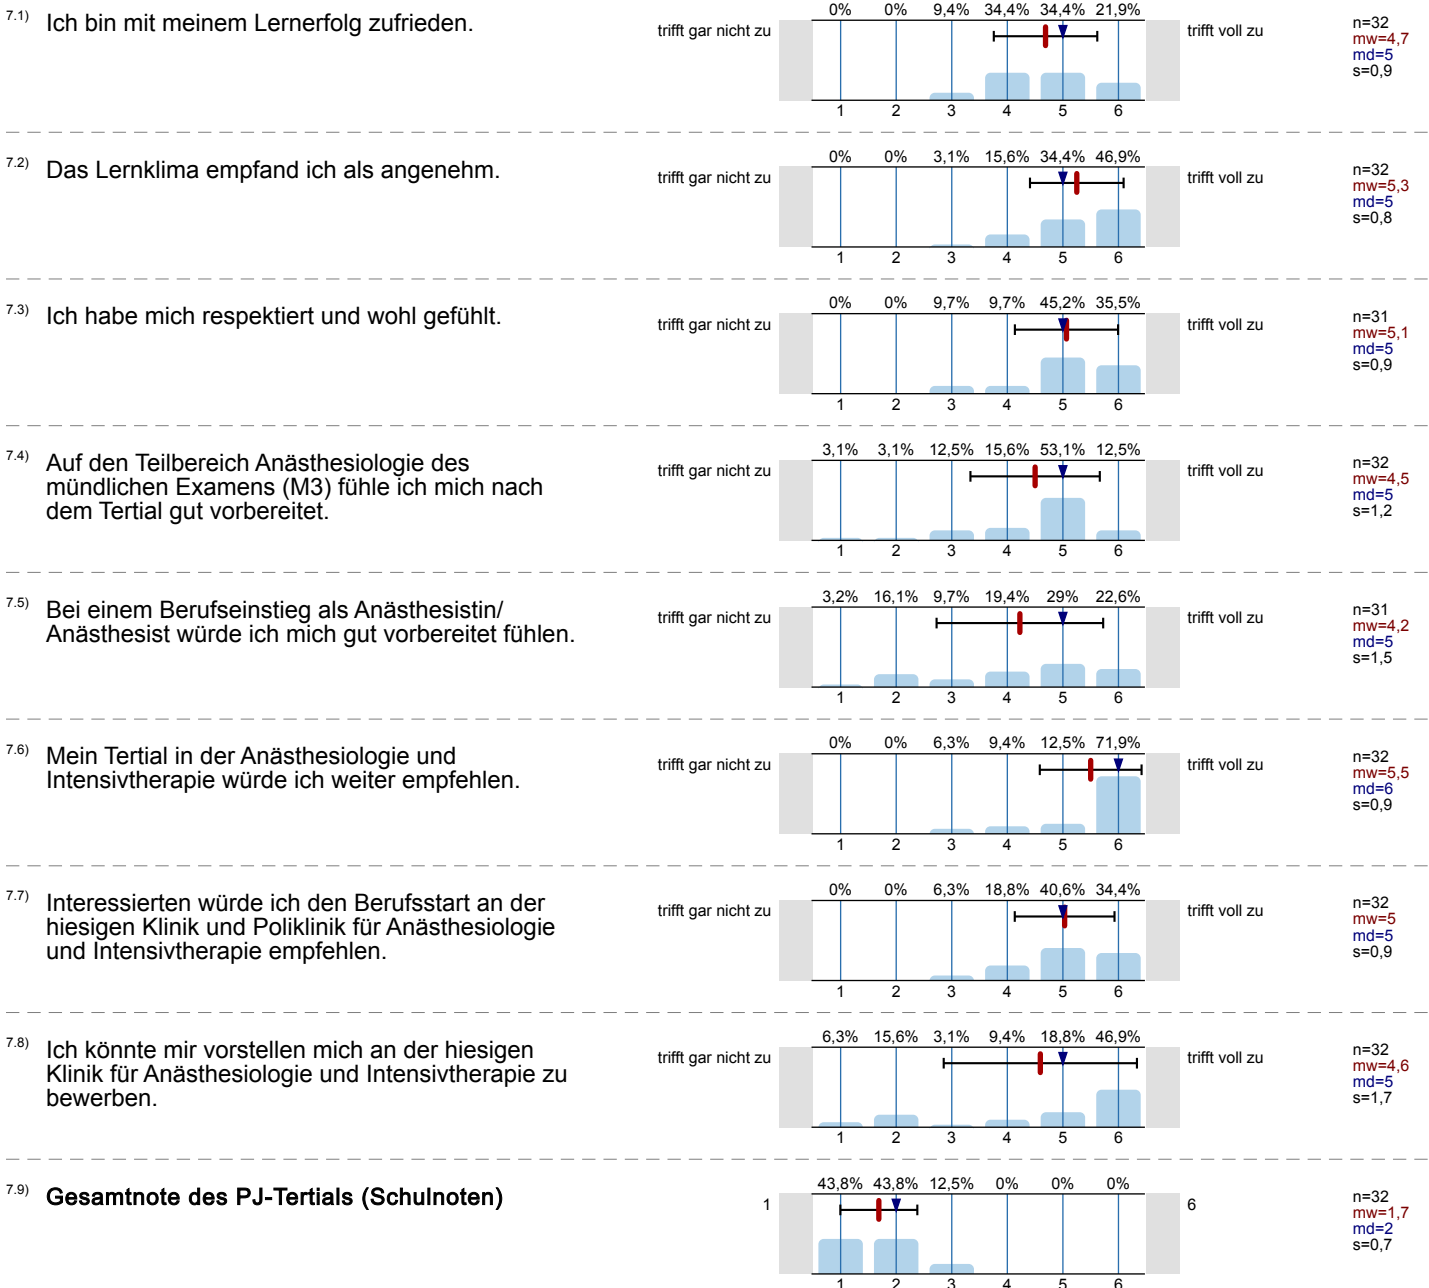

# Profilinie

Teilbereich: Anästhesiologie  
 Name der/des Lehrenden: Arbeitsgruppe Medizindidaktik  
 Titel der Lehrveranstaltung: Praktisches Jahr in der KAI  
 (Name der Umfrage)

Verwendete Werte in der Profilinie: Mittelwert

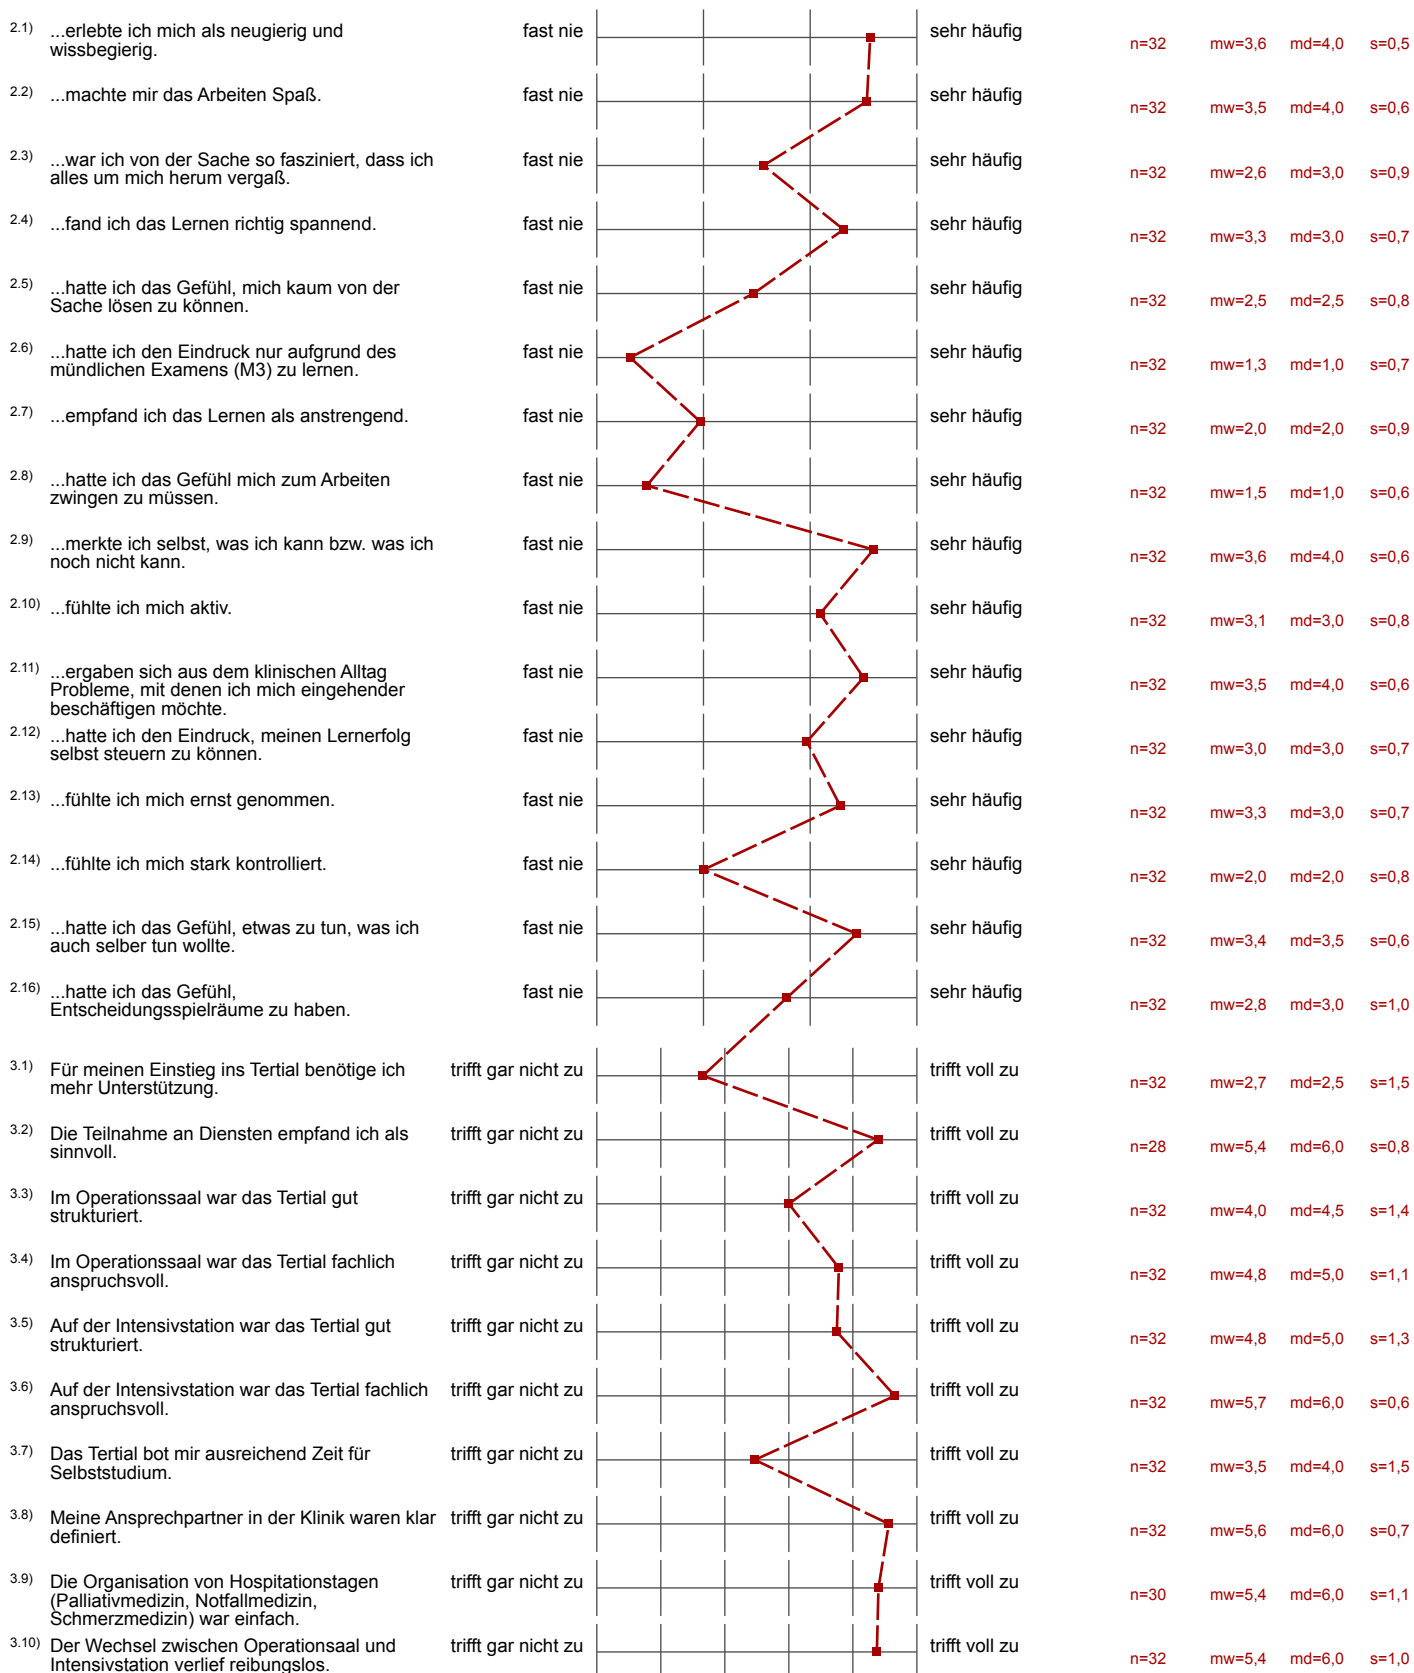



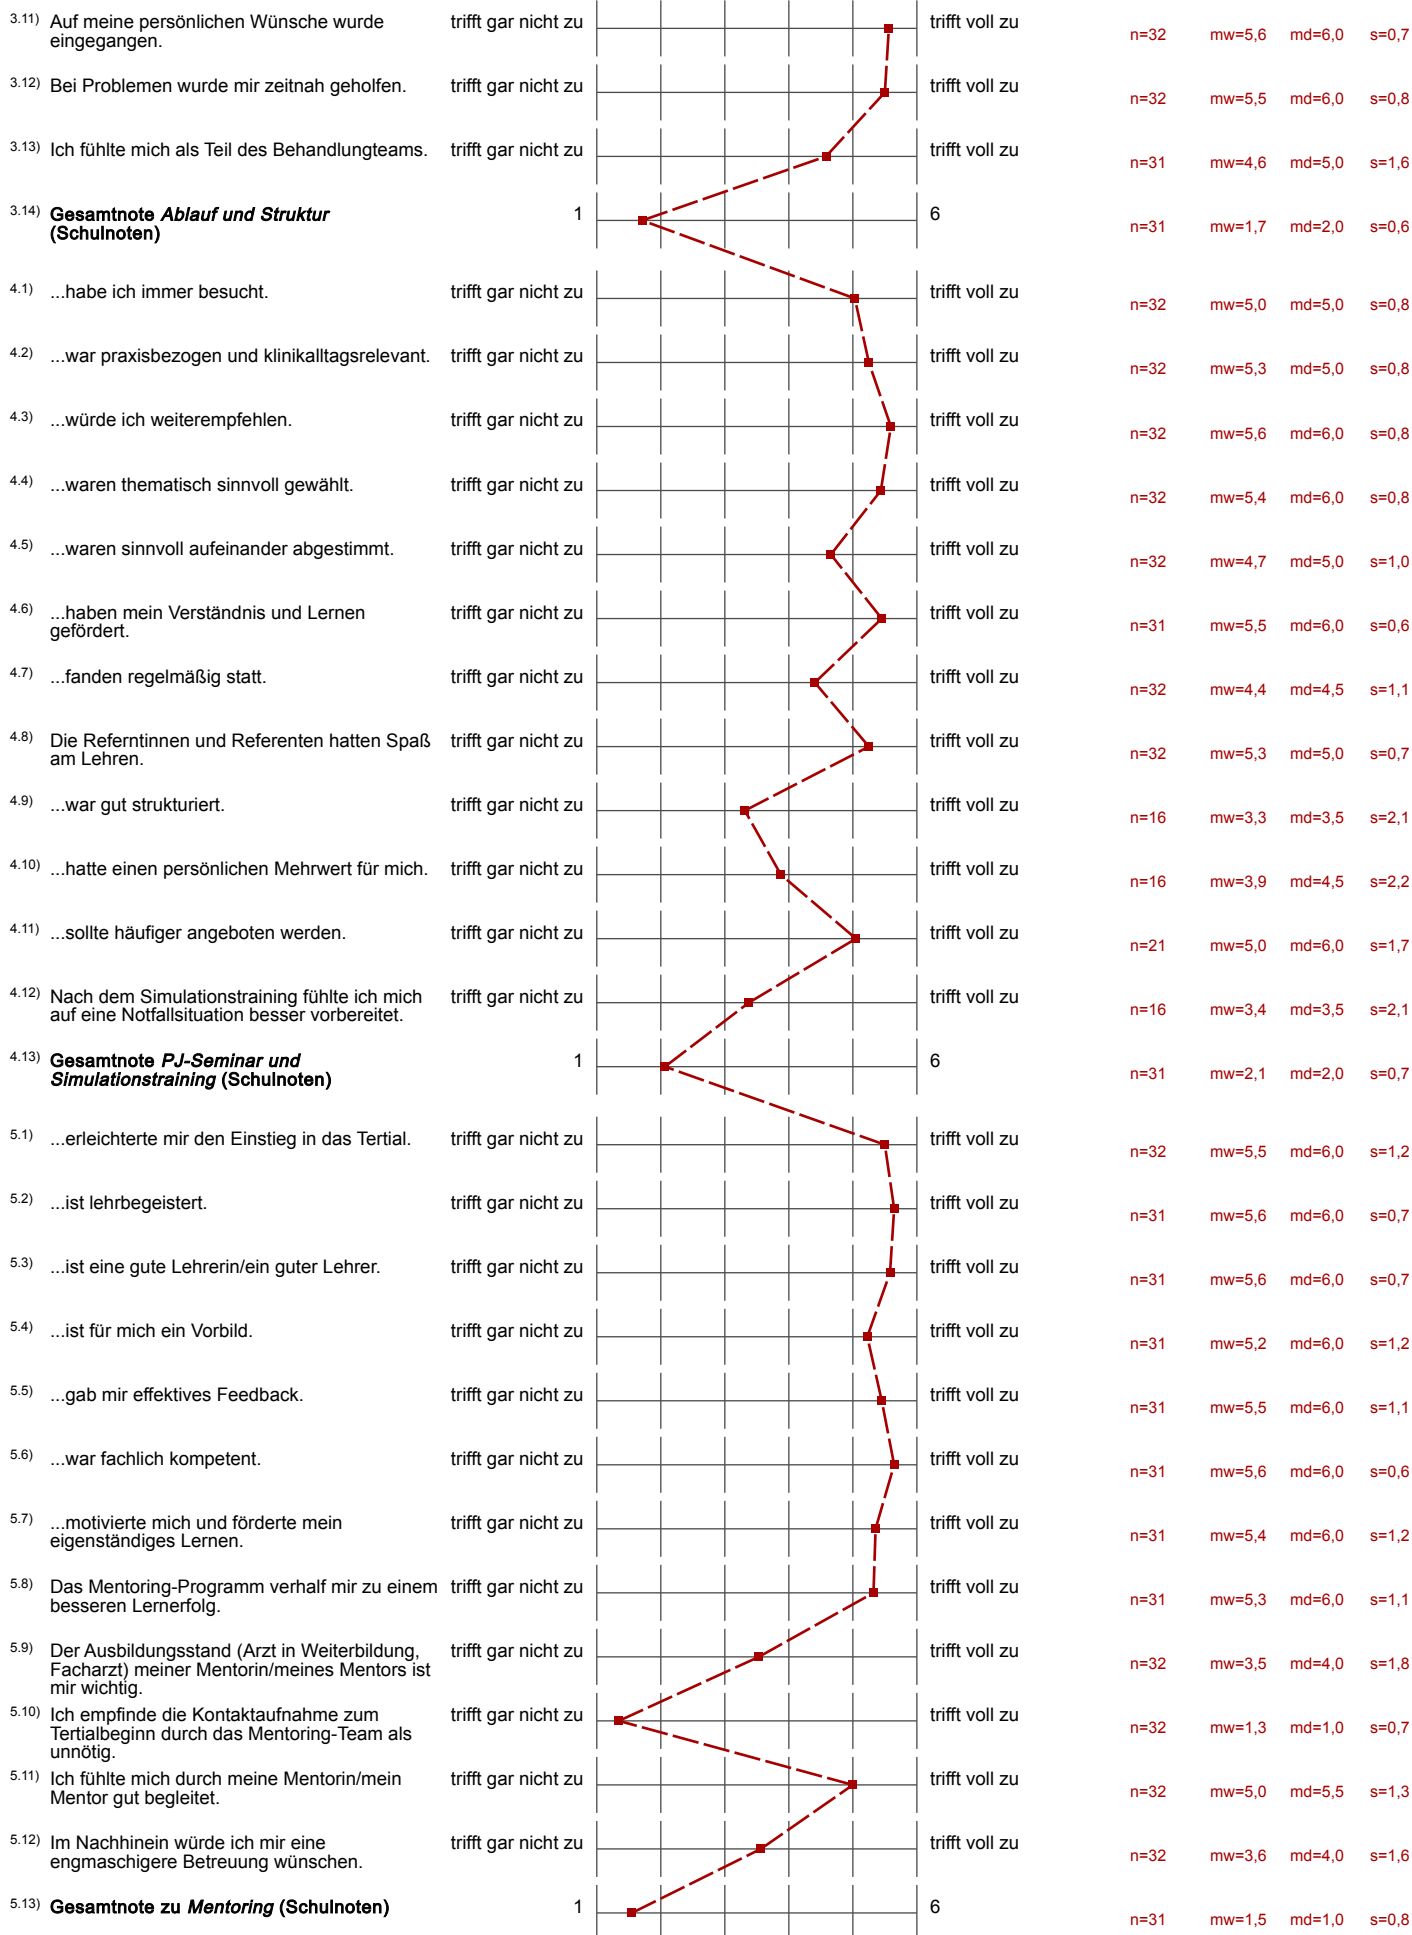

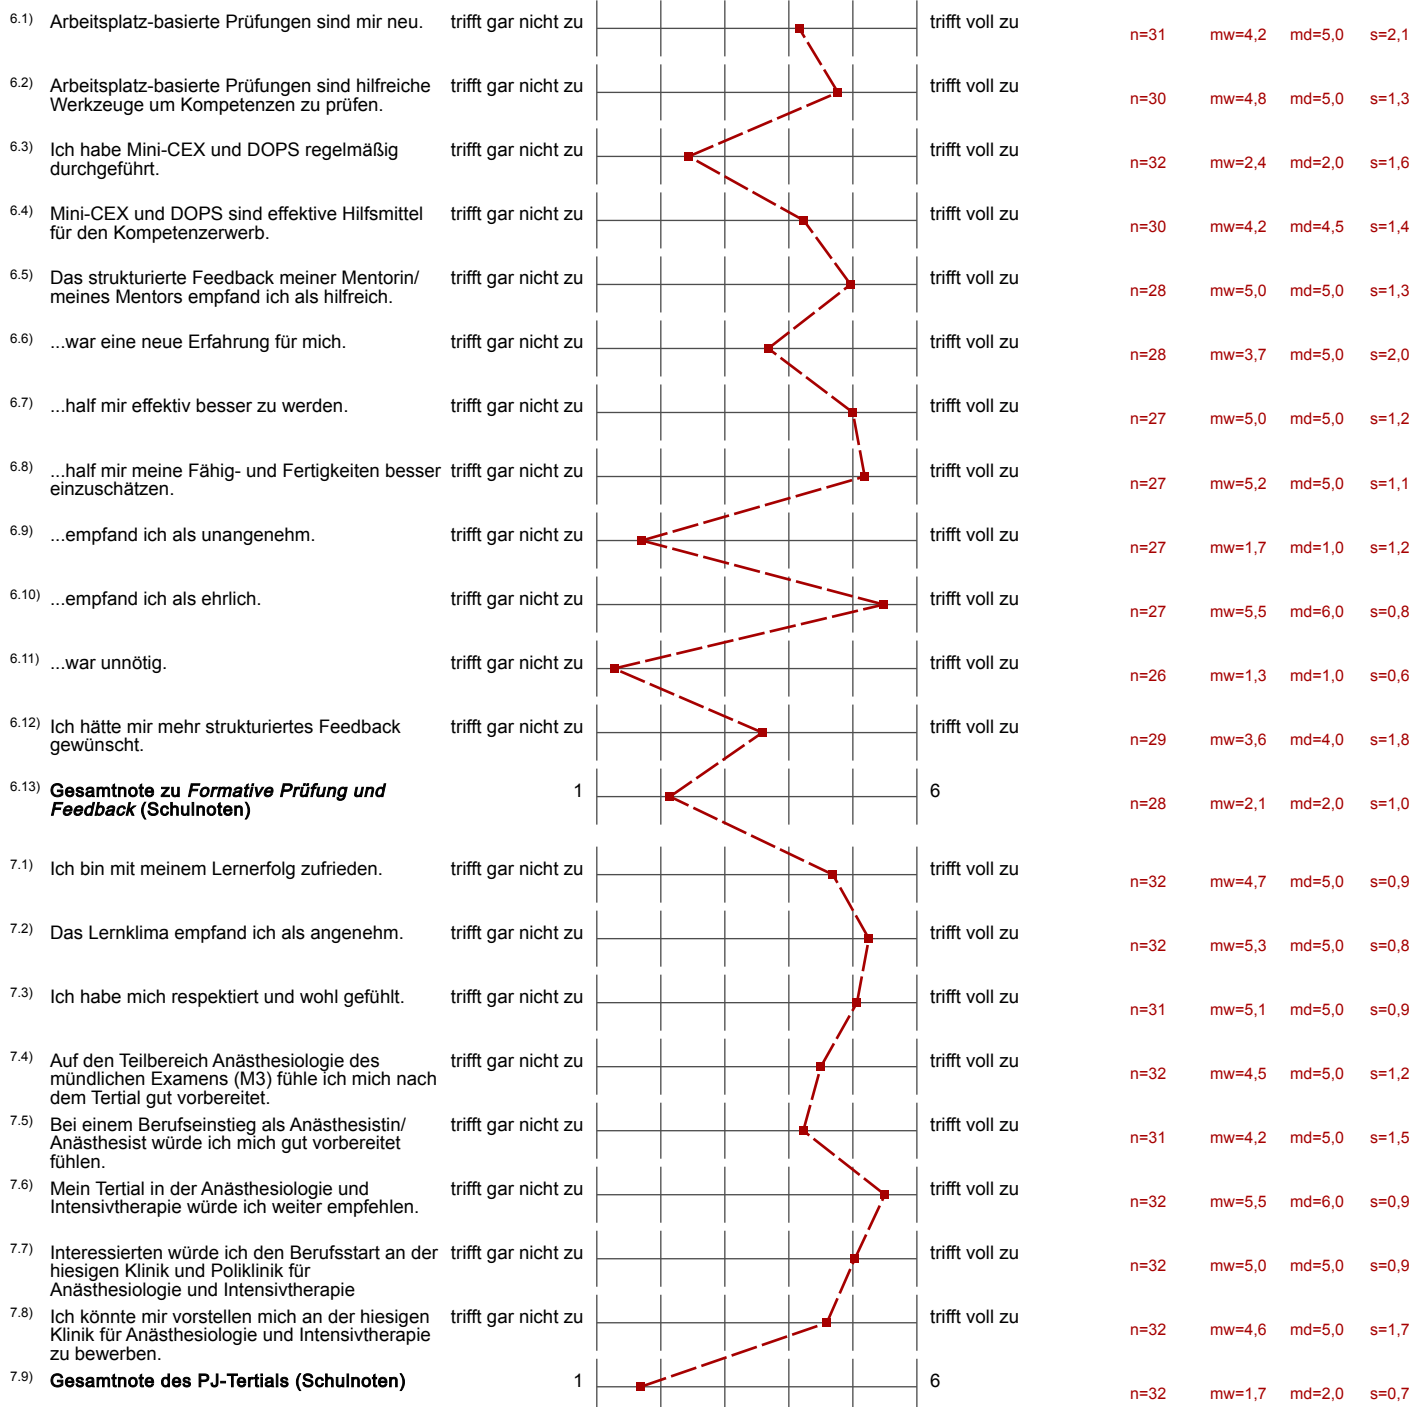

Supplement: MOESM3 [file 18681246]
