# Supplementary material for: Mentoring und arbeitsplatzbasierte Prüfungen im Praktischen Jahr
Source: Springer Nature journal article supplement (doi:10.1007/s00101-020-00902-7), 2020-12-14
Supplement: MOESM1 [file 18681246]

**Direct Observation of Procedural Skills (DOPS)**  
Klinik und Poliklinik für Anästhesiologie und Intensivtherapie

PJ Erfahrung     1. Tertial     2. Tertial     3. Tertial

Klinisch-praktische Kompetenz: \_\_\_\_\_  
TOP 10

Anzahl an DOPS Prüfungen Prüfling  
 0     1-4     5-9     >10x

*Bitte prüfen Sie folgende Bereiche und markieren Sie entsprechend*

|                                                           | Nicht ausreichend        | Unsicher                 | Kompetent                | N/B*                     |
|-----------------------------------------------------------|--------------------------|--------------------------|--------------------------|--------------------------|
| 1. Vorbereitung (Lagerung, Analgesie, ...)                | <input type="checkbox"/> | <input type="checkbox"/> | <input type="checkbox"/> | <input type="checkbox"/> |
| 2. Technische Fertigkeit                                  | <input type="checkbox"/> | <input type="checkbox"/> | <input type="checkbox"/> | <input type="checkbox"/> |
| 3. Aseptische Technik entsprechend der Hygienerichtlinien | <input type="checkbox"/> | <input type="checkbox"/> | <input type="checkbox"/> | <input type="checkbox"/> |
| 4. Kennt seine Grenzen und Sucht Hilfe wo erforderlich    | <input type="checkbox"/> | <input type="checkbox"/> | <input type="checkbox"/> | <input type="checkbox"/> |
| 5. Nachbereitung                                          | <input type="checkbox"/> | <input type="checkbox"/> | <input type="checkbox"/> | <input type="checkbox"/> |
| 6. Kommunikative Kompetenz                                | <input type="checkbox"/> | <input type="checkbox"/> | <input type="checkbox"/> | <input type="checkbox"/> |
| 7. Professionalität in Durchführung und Auftreten         | <input type="checkbox"/> | <input type="checkbox"/> | <input type="checkbox"/> | <input type="checkbox"/> |
| 8. <b>Gesamtbeurteilung</b>                               | <input type="checkbox"/> | <input type="checkbox"/> | <input type="checkbox"/> | <input type="checkbox"/> |

\*N/B Hier ankreuzen wenn das Verhalten nicht beobachtet wurde

Bitte benutzen Sie dieses Feld für Stärken und etwaige Verbesserungsvorschläge (Strukturiertes Feedback)

\_\_\_\_\_  
Unterschrift Student/-in

\_\_\_\_\_  
Datum, Unterschrift Arzt/Ärztin, Stempel

**Mini Clinical Evaluation Exercise (Mini-CEX)**  
Klinik und Poliklinik für Anästhesiologie und Intensivtherapie

PJ Erfahrung     1. Tertial     2. Tertial     3. Tertial

Klinisch-kommunikative Kompetenz: \_\_\_\_\_  
TOP 10

Anzahl an Mini-CEX Prüfungen Prüfling  
 0     1-4     5-9     >10x

*Bitte prüfen Sie folgende Bereiche und markieren Sie  
entsprechend*

|                                                   | <b>Nicht ausreichend</b> | <b>Unsicher</b>          | <b>Kompetent</b>         | N/B*                     |
|---------------------------------------------------|--------------------------|--------------------------|--------------------------|--------------------------|
| 1. Anamnese                                       | <input type="checkbox"/> | <input type="checkbox"/> | <input type="checkbox"/> | <input type="checkbox"/> |
| 2. Klinische Untersuchung                         | <input type="checkbox"/> | <input type="checkbox"/> | <input type="checkbox"/> | <input type="checkbox"/> |
| 3. Kommunikative Kompetenz                        | <input type="checkbox"/> | <input type="checkbox"/> | <input type="checkbox"/> | <input type="checkbox"/> |
| 4. Klinisches Urteilsvermögen                     | <input type="checkbox"/> | <input type="checkbox"/> | <input type="checkbox"/> | <input type="checkbox"/> |
| 5. Professionalität in Durchführung und Auftreten | <input type="checkbox"/> | <input type="checkbox"/> | <input type="checkbox"/> | <input type="checkbox"/> |
| 6. Organisation und Effizienz                     | <input type="checkbox"/> | <input type="checkbox"/> | <input type="checkbox"/> | <input type="checkbox"/> |
| <b>7. Gesamtbeurteilung</b>                       | <input type="checkbox"/> | <input type="checkbox"/> | <input type="checkbox"/> | <input type="checkbox"/> |

\*N/B Hier ankreuzen wenn das Verhalten nicht beobachtet wurde

Bitte benutzen Sie dieses Feld für Stärken und etwaige Verbesserungsvorschläge (Strukturiertes Feedback)

\_\_\_\_\_  
Unterschrift Student/-in

\_\_\_\_\_  
Datum, Unterschrift Arzt/Ärztin, Stempel
